# Supplementary material
Source: HighWire-hosted journal article supplement (http://jneurosci.org/highwire/filestream/599851/field_highwire_adjunct_files/1/27915_1_supp_73004_k8qlr0.pdf)

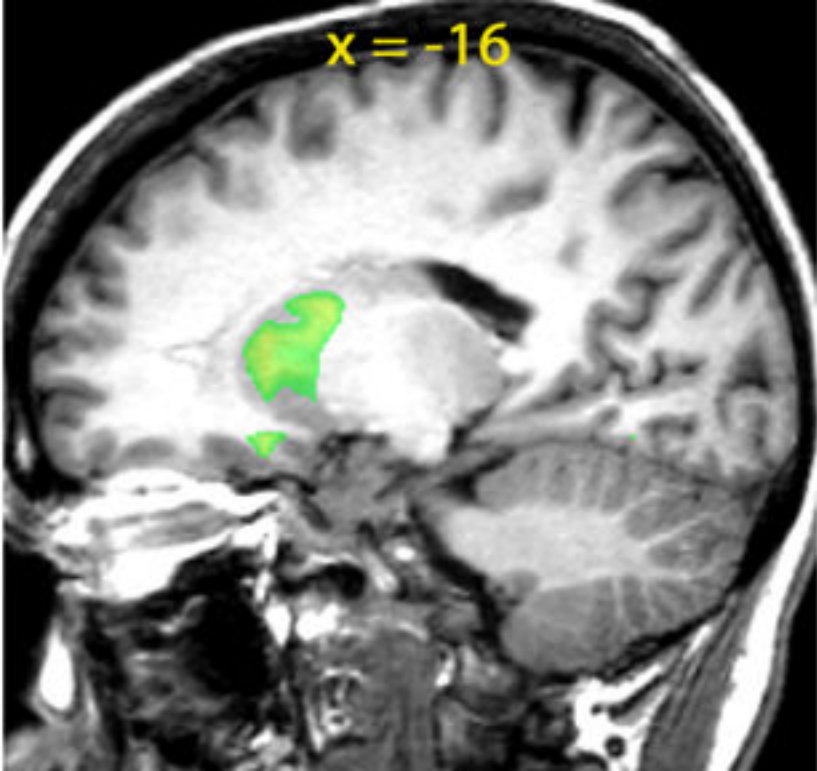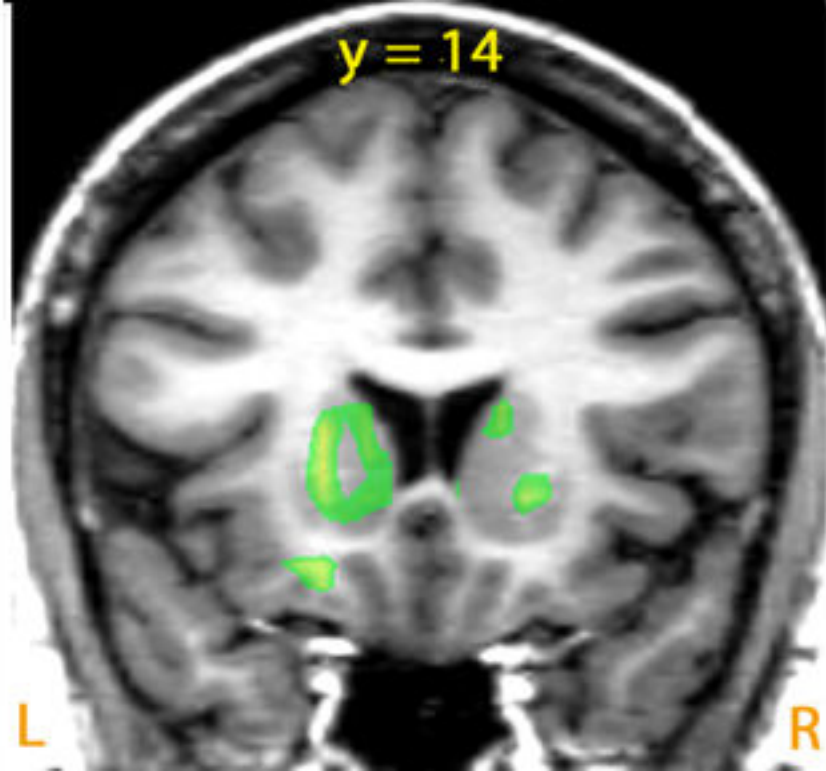

Supplement: 27915_1_supp_73004_k8qlr0.pdf [file 27915_1_supp_73004_k8qlr0.pdf]
